# Supplementary material
Source: publisher figshare collection journal article supplement (https://rs.figshare.com/ndownloader/files/15129344)
Supplement: Supplementary file 1 [file 15129344]

Supplementary Table 1: ANOVA table from the analysis for the prestimulus data in experiment 1 (PC1 scores from the combined pre-stimulus feeding strikes and line crosses).

| Source | df | F | P |
| --- | --- | --- | --- |
| Conditioning | 1, 66.1 | 3.41 | 0.07 |
| Conditioning Env | 1, 55.9 | 0.13 | 0.72 |
| Testing Env | 1, 120.4 | 1.23 | 0.27 |
| Conditioning x Conditioning Env | 1, 67.9 | 2.76 | 0.10 |
| Conditioning x Testing Env | 1, 119.1 | 1.20 | 0.28 |
| Conditioning Env x Testing Env | 1, 121.8 | 0.19 | 0.66 |
| Conditioning x Conditioning Env x Testing Env | 1, 119.6 | 0.48 | 0.49 |
| Conditioning Tank | 84, 41 | 0.97 | 0.55 |
